# Supplementary material for: A case of BRAF-mutant High-Grade Glioma with Pleomorphic and Pseudopapillary Features (HPAP) mimicking PLNTY but Exhibiting Aggressive Clinical Behavior
Source: Research Square preprint supplement (doi:10.21203/rs.3.rs-7429677/v1), 2025-08-27
Supplement: Supplementary file 1 [file f5b949f0b80ad411c90f1b02.xlsx]

## Sheet: Sheet1
Supplementary Table 1: Characteristics of HPAP cases
	publication	accession	platform	material	age	sex	OS_months	OS_status	PFS_months	PFS_status	sampling	sampling_treatment	HPAP_subtype	classifier_v11	classifier_v11_score	BRAF	NF1	NF2	RB1	TP53	PIK3CA	TERTp	KMT2A	BRCA2	CRLF2	CD79B	CDKN2A/B	panel	imaging	histology	mitotic activity	microvascular proliferation	necrosis	GFAP	Ki-67 (% positive)	Olig2	CD34	EMA	Reticulin
Case_1	Prat et al.	E-MTAB-5528	HumanMethylation450	Frozen	34	F	0.1	1			Primary	Pre-treatment	HPAP_B	No_match	No_match	NA	NA	NA	NA	NA	NA	NA	NA	NA	NA	NA	Balanced			Glioblastoma
Case_2	Prat et al.	E-MTAB-5528	HumanMethylation450	Frozen	37	F	24	0			Primary	Pre-treatment	HPAP_B	PXA	0.146	NA	NA	NA	NA	NA	NA	NA	NA	NA	NA	NA	Balanced			Anaplastic ganglioglioma
Case_3	Prat et al.		HumanMethylationEPIC	FFPE	35	F					Primary	Pre-treatment	HPAP_B	PXA	0.31	WT	F1247Ifs*18	WT	WT	WT	WT	WT	NA	NA	NA	NA	Balanced	TSO500;NeoG (NeoTYPE Brain Profile)	heterogeneous enhancement, coarse calficiations and necrotic or cystic components	Glioblastoma or PLNTY	Present	Present	Present	Patchy, weak	15-20	Patchy	Strong	Negative
Case_4	Prat et al.	GSE125450	HumanMethylationEPIC	FFPE	71	F	18	1			Primary		HPAP_A	PXA	0.654	WT (V600E)	NA	NA	NA	NA	NA	NA	NA	NA	NA	NA	Balanced	PCR		Anaplastic astroblastoma	≥5 per 10					Negative
Case_5	Prat et al.	GSE125450	HumanMethylationEPIC	FFPE	55	M	40	1			Primary		HPAP_B	PXA	0.35	WT (V600E)	NA	NA	NA	NA	NA	NA	NA	NA	NA	NA	Balanced	PCR		Astroblastoma	2 per 10					Positive
Case_6	Prat et al.	E‐MTAB‐7490	HumanMethylationEPIC	Frozen	23	F	91.1	0	16.6885	1	Primary		HPAP_B	GBM_MES	0.194	V600E	WT	NA	WT	WT	WT	WT	WT	WT	WT	WT	Balanced			Astroblastoma
Case_7	Prat et al.	E‐MTAB‐7490	HumanMethylationEPIC	Frozen	66	M	62.7	0	42.3279	1	Primary		HPAP_A	PXA	0.672	WT	WT	NA	WT	WT	WT	WT	WT	WT	WT	WT	Balanced			Astroblastoma
Case_8	Prat et al.	GSE143843	HumanMethylation450	FFPE		M					Recurrent	Post-treatment	HPAP_B	PXA	0.394	NA	NA	NA	NA	NA	NA	NA	NA	NA	NA	NA	Balanced			Glioblastoma
Case_9	Prat et al.		HumanMethylationEPIC	FFPE	57	M	74	0	59	1	Recurrent	Pre-treatment	HPAP_A	PXA	0.469	WT	WT	WT	S838*	W53R (VUS)	WT	WT	NA	NA	NA	NA	Balanced	TSO500		Glioblastoma	Present	Present	Present	Positive	25-30	Positive	Focal	Negative
Case_10	Prat et al.		HumanMethylationEPIC	FFPE	41	M	18	0	18	0	Primary		HPAP_B	PXA	0.298	WT	R2179H (VUS)	WT	WT	P177_C182del	WT	WT	WT	WT	WT	WT	Balanced	UCSF500 Cancer Gene Panel	3.3 cm expansile, T2/FLAIR hyperintense, heterogeneously enhancing with calicification	PLNTY or ganglioglioma	2 per 10	Not present	Not present	Patchy	0.12	Diffuse	Strong	Focal cytoplasmic	Negative
Case_11	Prat et al.		HumanMethylationEPIC	FFPE	41	F	131	0	103	0	Recurrent	Post-treatment	HPAP_A	PXA	0.654	WT	WT	WT	WT	WT	WT	WT	WT	WT	WT	WT	Balanced	Exome;RNA-seq	"extra-axial mass" 4.6 x 5.4 x 4.1 cm with extensive vasogenic edema	Anaplastic pleomorphic xanthoastrocytoma	>5 per 10	Present	Present	Positive	15-20		Positive
Case_12	Prat et al.		HumanMethylationEPIC	FFPE	56	F					Primary	Pre-treatment	HPAP_B	GBM_MES	0.292	WT	WT	WT	WT	V73fs*	WT	WT	WT	WT	NA	WT	Balanced	PBTP;Moffit STAR Targeted NGS		Glioblastoma	2 per 1	Present	Present	Positive	0.1	Positive	Focal	Variable, dot-like	Negative
Case_13	Prat et al.		HumanMethylationEPIC	FFPE	14	F	11	0	11	0	Primary		HPAP_B	GBM_MES	0.276	WT	E2578*	WT	WT	E271V	WT	WT	WT	Rearrangement	NA	NA	Balanced	TSO500;OncoPlus Universal Cancer Mutation Analysis Panel (NGS)	cystic and enhancing component	Glioma	1 per 10	Not present	Not present
Case_14	Prat et al.		HumanMethylationEPIC	FFPE	46	M	45	0	33	1	Recurrent		HPAP_B	GBM_MES	0.479	WT	WT	WT	E204*	R213Q;V143M	WT	C228T	NA	NA	NA	NA	Balanced	TSO500;Northwestern Comprehensive Cancer NGS Panel		Anaplastic ependymoma	3 per 10	Not present	Not present	Positive	0.15	Positive		Weak cytoplasmic, dot-like
Case_15	Prat et al.		HumanMethylationEPIC	FFPE	45	F	199	0	199	0	Primary		HPAP_A	PXA	0.273	WT	WT	WT	WT	WT	WT	WT	NA	NA	NA	NA	Deletion	PBTP		Anaplastic astrocytoma	Present	Not present	Not present	Positive	3-5%		Negative	Negative	Negative
Case_16	Prat et al.		HumanMethylationEPIC	FFPE	64	F	7	0	7	0	Primary		HPAP_B	PXA	0.141	V600E	NA	NA	NA	NA	NA	WT	NA	NA	NA	NA	Balanced		"extra-axial"	Astroblastoma	5 per 10	Not present	Not present	Positive	0.1	Positive	Strong
Case_17	Prat et al.		HumanMethylationEPIC	FFPE	54	F	6	0	6	0	Primary		HPAP_A	PXA	0.862	WT	WT	WT	WT	P151S	WT	WT	NA	NA	NA	NA	Balanced	PBTP		Glioma	1 per 10	Present	Present	Positive		Positive	Strong	Negative
Case_18	Prat et al.		HumanMethylationEPIC	FFPE	43	M	79	0	79	0			HPAP_A	EPN_RELA	0.108	WT	WT	WT	WT	H193R	Q546E	WT	NA	NA	NA	NA	Balanced	PBTP		Glioblastoma	9 per 10	Present	Present	Positive	0.4	Positive
Case_19	Prat et al.		HumanMethylationEPIC	FFPE	36	M	11	0	11	0	Primary		HPAP_B	EPN_SPINE	0.272	WT	WT	Q319fs*24	WT	WT	WT	WT	WT	WT	WT	WT	Balanced	TSO500;RNA-seq	cystic frontal mass with nodular areas of enhancement	Glioblastoma	2 per 10	Present	Present	Positive	0.2	Negative	Patchy	Negative	Negative
Case_20	Prat et al.		HumanMethylationEPIC	FFPE	70	F					Primary		HPAP_A	EPN_SPINE	0.141	WT	E775V (VUS)	E394*	WT	WT	WT	WT	K1598fs*25	WT	WT	WT	Balanced	TSO500	"cerebellar tumor with cyst"	Pilocytic astrocytoma	1 per 10	Not present	Not present	Positive	2025-01-15	Negative	Negative	Negative
Case_21	Prat et al.		HumanMethylationEPIC	FFPE	56	F							HPAP_B	PXA	0.746	WT	WT	WT	WT	WT	WT	WT	WT	WT	WT	WT	Balanced	TSO500		Glioma	1 per 10	Not present	Not present	Positive	2	Positive		Weak and focal
Case_22	Prat et al.		HumanMethylationEPIC	FFPE	20	F	152	0	67	0	Recurrent	Post-treatment	HPAP_A	GBM_MES	0.234	WT	WT	WT	M484fs*6	T125R	WT	WT	WT	WT	79+1G>A	R57fs*4	Balanced	TSO500		Anaplastic ependymoma	>10 per 10	Present	Present	Positive	0.25	Negative		Variable, dot-like
Case_23	Prat et al.		HumanMethylationEPIC	FFPE	47	F	83	0	83	0	Recurrent		HPAP_A	EPN_PF_B	0.195	WT	F1247fs*18	G319fs*3	WT	WT	WT	WT	WT	WT	WT	WT	Balanced	TSO500;RNA-seq		Anaplastic ependymoma	9 per 10	Not present	Not present	Positive	0.15	Negative	Negative	Negative
Case_24	Prat et al.		HumanMethylationEPIC	FFPE	52	F					Primary		HPAP_B	GBM_MES	0.222	WT	WT	WT	WT;deletion	WT	WT	WT	WT	K1872fs*2	WT	WT	Balanced	TSO500;Caris Life Sciences NGS	MRI demonstrates a 6.4 x 4.2 cm cystic and solid enhancing lesion within the left occipital lobe. There is peripheral rim enhancement with more solid mass-like enhancement along the medial aspect of the lesion within the medial occipital lobe	Anaplastic astroblastoma/anaplastic ependymoma/anaplastic pleomorphic xanthoastrocytoma	8 per 10	Not present	Present	Positive		Positive	Diffuse	Patchy cytoplasmic, dot-like
Case_25	Prat et al.		HumanMethylationEPIC	FFPE	49	F					Primary		HPAP_A	PXA	0.294	WT	WT	WT	I172fs*9	E286A	WT	WT	WT	WT	WT	WT	Balanced	TSO500;RNA-seq		Anaplastic ependymoma/glioblastoma	>10 per 10	Not present	Present	Positive	5-10%	Positive	Strong	Perinuclear dot-like
Case_26	Prat et al.		HumanMethylationEPIC	FFPE	32	M	3	0	3	0	Primary		HPAP_B	GBM_MES	0.306	WT	WT	WT	WT	R267W	WT	WT	NA	NA	NA	NA	Balanced	Mayo Neuro-Oncology Expanded Gene Panel	very large left frontal cystic mass, measuring 9 cm with a solid enhancing component anteromedially measuring 3.1 x 2.6 x 3.3 cm	Low-grade glial or glioneuronal tumor	<1 per 10	Not present	Not present	Positive		Positive	Positive	Perinuclear dot-like
Case_27	Prat et al.		HumanMethylationEPIC	FFPE	46	M					Primary		HPAP_B	PXA	0.373	V600E	NA	NA	NA	NA	NA	C228T	NA	NA	NA	NA	Balanced			Glioblastoma/anaplastic pleomorphic xanthoastrocytoma	<1 per 10	Present	Not present	Variable	0.01
Case_28	Prat et al.		HumanMethylationEPIC	FFPE	50	M	62	0	58	1	Recurrent	Post-treatment	HPAP_A	PXA	0.513	WT	M817T	WT	R668S	A161T	WT	WT	WT	WT	WT	WT	Balanced	JHMI Solid Tumor Panel-v6		Astroblastoma	2 per 10	Present	Present	Positive		Patchy		Focal
Case_29	Prat et al.		HumanMethylationEPIC	FFPE	66	M					Recurrent	Post-treatment	HPAP_A	PXA	0.437	WT	WT	WT	WT	MUT	WT	WT	NA	NA	NA	NA	Deletion	Jefferson Health Brain Tumor Molecular Panel		Anaplastic astrocytoma	2 per 10	Not present	Not present	Positive		Positive	Negative	Negative
Case_30	Prat et al.	GSE188547	HumanMethylationEPIC	FFPE	53	M							HPAP_A	GBM_MES	0.618	NA	NA	NA	NA	NA	NA	NA	NA	NA	NA	NA	Balanced			Unknown
Case_31	Prat et al.		HumanMethylationEPIC	FFPE	33	F							HPAP_A	PXA	0.138	WT	WT	WT	WT	MUT	WT	WT	NA	NA	NA	NA	Balanced	Mayo Neuro-Oncology Expanded Gene Panel		Papillary glial neoplasm	2 per 10	Not present	Not present	Positive		Positive
Case_32	Rossi et al. 2025	NA	NA	FFPE	14	M	10	0	NA	NA	Primary	NA	HPAP_A	No_match	No_match	NA	NA	A323fs	inact.	inact.	NA	NA	NA	NA	NA	NA	Balanced	NGS, SNP, methylation	57×58×64 mm cystic-solid mass, midline shift, hydrocephalus	Ependymoma-like high-grade glioma with pleomorphic and pseudopapillary features, with low-grade component suggesting evolution from NF2-inactivated precursor	up to 14/mm2	Present	Present	Patchy	20–40%	Negative	Focal	Dot-like	NA
Case_33	Rossi et al. 2025	NA	NA	FFPE	29	F	42	0	NA	NA	Primary	NA	HPAP_A	No_match	No_match	NA	NA	WT	mutant	mutant	NA	NA	NA	NA	NA	NA	Balanced	NGS, methylation	Right parietal-frontal cystic-solid mass	Astroblastoma-like high-grade glioma with pseudopapillary features and diffuse pleomorphism	Scattered	Present	Present	Positive	0.05	Positive	Positive	Negative	NA
Case_34	Gubbiotti et al. 2024	NA	NA	FFPE	62	M	NA	NA	NA	NA	Primary	NA	HPAP_A	No_match	No_match	WT	NA	WT	WT	mutant	NA	NA	NA	NA	NA	NA	Balanced	NGS, methylation	2.7×2.6 cm right frontal circumscribed lesion with osteoma	Well-circumscribed glial neoplasm with papillary architecture, severe pleomorphism, necrosis, and PBRM1 mutation	Present	Present	Present	NA	NA	Negative	NA	NA	NA
Case_35	Present Case				47	F	18	0	18	0	Primary					V600E	WT	WT	WT	WT	WT	C228T	WT	WT	WT	WT	Balanced			PLNTY		Not present	Not present	Positive	20	Positive	Strong
